# Supplementary material
Source: MDPI journal article supplement (https://www.mdpi.com/2073-445X/11/8/1345)
Supplement: s1 [file s1]

**SUPPLEMENTARY MATERIALS**

**Pasture management to reduce the risk of *Acer pseudoplatanus* poisoning while preserving ecological sustainability**

Barbara Ghislain<sup>1</sup>, Arnaud Farinelle<sup>1</sup>, Benoît Renaud<sup>2</sup>, Anne-Christine François<sup>2</sup>, Clovis P. Wouters<sup>2,\*</sup> and Dominique-Marie Votion<sup>2</sup>

1 Fourrages Mieux asbl, 6900 Marloie, Belgium;

2 Department of Functional Sciences, Faculty of veterinary Medicine, Pharmacology and Toxicology, Fundamental and Applied Research for Animals & Health (FARAH), University of Liège, 4000 Liège 1 (Sart Tilman), Belgium;

\* Correspondence: [clovis.wouters@uliege.be](mailto:clovis.wouters@uliege.be)

Table of Contents

|                                     |     |
|-------------------------------------|-----|
| Supplementary table S1: .....       | S-2 |
| Supplementary Excel Table S2: ..... | S-4 |
| Supplementary Excel Table S3: ..... | S-4 |
| Supplementary Excel Table S4: ..... | S-4 |
| Supplementary Excel Table S5: ..... | S-4 |
| Supplementary Excel Table S6: ..... | S-4 |
| Supplementary Excel Table S7: ..... | S-4 |
| Supplementary Excel Table S8: ..... | S-4 |

# SUPPLEMENTARY TABLE S1

Table S1. List of the five species with highest cover in experiment 1 and 2, before (D0-D24) and after (D42 or D29) treatments: untreated condition, mowing, Doxstar®, Genoxone®, Garlon Super®, mowing 1 and 2. Mean cover and standard deviation are indicated in brackets. Grass species are in bold and legume species are underlined.

| Experiment | Intervention | Before                                                                                                                                                                                                                                                                                                                                                                                                                                | After                                                                                                                                                                                                                                                                                                                                                                                                                                                 |
|------------|--------------|---------------------------------------------------------------------------------------------------------------------------------------------------------------------------------------------------------------------------------------------------------------------------------------------------------------------------------------------------------------------------------------------------------------------------------------|-------------------------------------------------------------------------------------------------------------------------------------------------------------------------------------------------------------------------------------------------------------------------------------------------------------------------------------------------------------------------------------------------------------------------------------------------------|
| 1          | Untreated    | <b><i>Lolium perenne</i></b> (23.1±13.0%)<br><i>Acer pseudoplatanus</i> (18.0±3.3%)<br><b><i>Holcus lanatus</i></b> (17.8±8.8%)<br><b><i>Alopecurus pratensis</i></b> (13.7±9.3%)<br><i>Geranium molle</i> (6.5±4.7%)<br><i>Taraxacum sp.</i> (6.0±8.7%)<br><u><i>Trifolium repens</i></u> (3.3±4.5%)<br><i>Ranunculus acris</i> (3.2±6.3%)<br><i>Stellaria media</i> (3.0±3.5%)<br><b><i>Dactylis glomerata</i></b> (1.5±3.5%)       | <b><i>Holcus lanatus</i></b> (15.4±11.4%)<br><b><i>Poa trivialis</i></b> (14.2±9.8%)<br><u><i>Trifolium repens</i></u> (9.0±9.2%)<br><b><i>Agrostis tenuis</i></b> (8.9±7.0%)<br><i>Geranium dissectum</i> (8.2±8.4%)<br><b><i>Lolium perenne</i></b> (8.0±4.5%)<br><b><i>Agrostis stolonifera</i></b> (4.8±4.4%)<br><i>Plantago lanceolata</i> (4.7±3.2%)<br><b><i>Bromus mollis</i></b> (4.6±5.3%)<br><b><i>Alopecurus pratensis</i></b> (3.3±2.7%) |
|            | Mowing       | <b><i>Lolium perenne</i></b> (25.0±11.3%)<br><b><i>Holcus lanatus</i></b> (18.9±3.2%)<br><b><i>Alopecurus pratensis</i></b> (16.6±9.6%)<br><i>Acer pseudoplatanus</i> (13.6±6.3%)<br><i>Plantago lanceolata</i> (5.6±4.1%)<br><i>Ranunculus repens</i> (3.6±7.2%)<br><u><i>Trifolium repens</i></u> (3.5±6.0%)<br><i>Ranunculus acris</i> (3.4±5.9%)<br><i>Capsella bursa-pastoris</i> (2.4±1.6%)<br><i>Geranium molle</i> (2.3±3.0%) | <b><i>Poa trivialis</i></b> (14.3±6.8%)<br><b><i>Lolium perenne</i></b> (14.0±8.5%)<br><u><i>Trifolium repens</i></u> (12.2±9.9%)<br><b><i>Holcus lanatus</i></b> (10.3±7.8%)<br><b><i>Agrostis stolonifera</i></b> (8.7±9.4%)<br><i>Plantago lanceolata</i> (7.4±6.1%)<br><i>Ranunculus acris</i> (7.3±6.5%)<br><b><i>Agrostis tenuis</i></b> (4.9±4.2%)<br><i>Geranium dissectum</i> (4.6±3.7%)<br><i>Taraxacum sp.</i> (3.0±2.0%)                  |
|            | Doxstar      | <b><i>Holcus lanatus</i></b> (25.9±17.7%)<br><b><i>Lolium perenne</i></b> (20.9±11.6%)<br><b><i>Alopecurus pratensis</i></b> (11.4±6.7%)<br><u><i>Trifolium repens</i></u> (10.4±11.8%)<br><i>Acer pseudoplatanus</i> (8.4±5.2%)<br><i>Plantago lanceolata</i> (5.3±5.7%)<br><i>Ranunculus acris</i> (4.9±4.2%)<br><i>Taraxacum sp.</i> (4.7±3.9%)<br><b><i>Dactylis glomerata</i></b> (3.0±3.6%)<br><i>Geranium molle</i> (1.4±2.7%) | <b><i>Holcus lanatus</i></b> (25.2±10.7%)<br><b><i>Poa trivialis</i></b> (16.8±9.9%)<br><b><i>Agrostis tenuis</i></b> (14.5±12.4%)<br><b><i>Lolium perenne</i></b> (9.6±7.3%)<br><b><i>Holcus mollis</i></b> (5.8±11.6%)<br><b><i>Alopecurus pratensis</i></b> (5.0±5.5%)<br><i>Ranunculus acris</i> (3.6±4.4%)<br><i>Plantago lanceolata</i> (3.1±4.3%)<br><b><i>Bromus mollis</i></b> (3.1±3.6%)<br><b><i>Agrostis stolonifera</i></b> (3.0±6.1%)   |
|            | Genoxone     | <b><i>Holcus lanatus</i></b> (26.9±20.4%)<br><b><i>Alopecurus pratensis</i></b> (22.6±8.3%)<br><i>Acer pseudoplatanus</i> (15.5±9.9%)                                                                                                                                                                                                                                                                                                 | <b><i>Poa trivialis</i></b> (36.9±10.5%)<br><b><i>Holcus lanatus</i></b> (17.8±19.4%)<br><b><i>Lolium perenne</i></b> (13.3±4.5%)                                                                                                                                                                                                                                                                                                                     |

|   |              |                                                                                                                                                                                                                                                                                                                                                                                                                                               |                                                                                                                                                                                                                                                                                                                                                                                                                                              |
|---|--------------|-----------------------------------------------------------------------------------------------------------------------------------------------------------------------------------------------------------------------------------------------------------------------------------------------------------------------------------------------------------------------------------------------------------------------------------------------|----------------------------------------------------------------------------------------------------------------------------------------------------------------------------------------------------------------------------------------------------------------------------------------------------------------------------------------------------------------------------------------------------------------------------------------------|
|   |              | <i><b>Lolium perenne</b></i> (14.1±10.5%)<br><i><u>Trifolium repens</u></i> (4.4±6.3%)<br><i>Geranium molle</i> (3.0±4.0%)<br><i>Plantago lanceolata</i> (3.0±6.1%)<br><i><b>Dactylis glomerata</b></i> (2.2±4.3%)<br><i>Urtica dioica</i> (1.8±3.7%)<br><i>Ranunculus acris</i> (1.5±2.3%)                                                                                                                                                   | <i><b>Agrostis stolonifera</b></i> (9.3±8.1%)<br><i><b>Agrostis tenuis</b></i> (7.7±8.3%)<br><i><b>Dactylis glomerata</b></i> (4.0±4.7%)<br><i><b>Alopecurus pratensis</b></i> (2.9±2.7%)<br><i><b>Bromus mollis</b></i> (1.9±3.8%)<br><i><b>Phleum pratense</b></i> (1.8±3.5%)<br><i><b>Holcus mollis</b></i> (1.5±3.0%)                                                                                                                    |
|   | Garlon super | <i><b>Lolium perenne</b></i> (29.9±8.4%)<br><i><b>Holcus lanatus</b></i> (18.6±14.7%)<br><i>Acer pseudoplatanus</i> (12.3±4.7%)<br><i><b>Alopecurus pratensis</b></i> (11.3±8.2%)<br><i><u>Trifolium repens</u></i> (8.4±7.7%)<br><i>Plantago lanceolata</i> (7.3±9.8%)<br><i><b>Dactylis glomerata</b></i> (4.2±5.7%)<br><i>Taraxacum sp.</i> (2.7±5.4%)<br><i>Cerastium vulgatum</i> (2.1±2.1%)<br><i><b>Agrostis tenuis</b></i> (1.7±3.3%) | <i><b>Holcus lanatus</b></i> (22.6±9.4%)<br><i><b>Poa trivialis</b></i> (21.3±5.2%)<br><i><b>Agrostis tenuis</b></i> (13.6±16.3%)<br><i><b>Lolium perenne</b></i> (13.6±13.4%)<br><i>Plantago lanceolata</i> (9.1±6.9%)<br><i><b>Alopecurus pratensis</b></i> (6.2±5.2%)<br><i><b>Agrostis stolonifera</b></i> (4.3±5.3%)<br><i>Taraxacum sp.</i> (2.6±3.1%)<br><i><b>Bromus mollis</b></i> (2.2±4.4%)<br><i><b>Poa annua</b></i> (1.6±3.2%) |
| 2 | Untreated    | <i><b>Lolium perenne</b></i> (22.5±11.2%)<br><i><b>Alopecurus pratensis</b></i> (18.6±19.8%)<br><i><b>Agrostis tenuis</b></i> (12.6±14.6%)<br><i>Taraxacum sp.</i> (11.0±3.9%)<br><i>Bellis perennis</i> (10.7±7.3%)<br><i>Acer pseudoplatanus</i> (4.3±4.0%)<br><i>Ranunculus repens</i> (4.3±5.1%)<br><i>Ranunculus acris</i> (4.0±4.7%)<br><i><u>Trifolium repens</u></i> (2.5±2.2%)<br><i><b>Agrostis stolonifera</b></i> (2.4±2.8%)      | <i><b>Lolium perenne</b></i> (25.7±6.6%)<br><i><b>Poa trivialis</b></i> (21.8±11.2%)<br><i>Taraxacum sp.</i> (10.9±6.2%)<br><i>Ranunculus repens</i> (9.3±9.1%)<br><i>Ranunculus acris</i> (7.9±4.5%)<br><i><u>Trifolium repens</u></i> (4.6±2.1%)<br><i>Plantago lanceolata</i> (3.1±3.7%)<br><i><b>Alopecurus pratensis</b></i> (2.8±3.4%)<br><i><b>Holcus lanatus</b></i> (2.4±3.2%)<br><i>Cerastium vulgatum</i> (1.9±2.3%)              |
|   | Mowing 1     | <i><b>Lolium perenne</b></i> (26.3±11.5%)<br><i><b>Alopecurus pratensis</b></i> (25.1±9.8%)<br><i>Bellis perennis</i> (13.6±4.0%)<br><i>Taraxacum sp.</i> (10.9±3.6%)<br><i>Acer pseudoplatanus</i> (9.8±5.7%)<br><i>Ranunculus repens</i> (4.3±3.6%)<br><i>Ranunculus acris</i> (4.2±2.2%)<br><i><u>Trifolium repens</u></i> (1.7±1.3%)<br><i><b>Festuca rubra</b></i> (1.1±2.2%)<br><i><b>Phleum pratense</b></i> (0.9±1.1%)                | <i><b>Lolium perenne</b></i> (28.9±5.7%)<br><i><b>Alopecurus pratensis</b></i> (12.8±10.8%)<br><i><b>Poa trivialis</b></i> (12.8±10.8%)<br><i>Taraxacum sp.</i> (10.8±4.6%)<br><i>Ranunculus acris</i> (8.6±1.3%)<br><i><u>Trifolium repens</u></i> (5.5±3.1%)<br><i>Bellis perennis</i> (4.7±3.9%)<br><i>Ranunculus repens</i> (4.5±2.9%)<br><i><u>Trifolium pratense</u></i> (3.3±2.3%)<br><i><u>Trifolium dubium</u></i> (1.4±2.7%)       |

|  |          |                                                                                                                                                                                                                                                                                                                                                                                                                   |                                                                                                                                                                                                                                                                                                                                                                                                                             |
|--|----------|-------------------------------------------------------------------------------------------------------------------------------------------------------------------------------------------------------------------------------------------------------------------------------------------------------------------------------------------------------------------------------------------------------------------|-----------------------------------------------------------------------------------------------------------------------------------------------------------------------------------------------------------------------------------------------------------------------------------------------------------------------------------------------------------------------------------------------------------------------------|
|  | Mowing 2 | <i><b>Lolium perenne</b></i> (45.3±7.5%)<br><i>Bellis perennis</i> (11.1±6.5%)<br><i>Ranunculus repens</i> (8.9±10.1%)<br><i><b>Agrostis tenuis</b></i> (8.5±7.0%)<br><i>Taraxacum sp.</i> (7.1±7.6%)<br><i>Cerastium vulgatum</i> (3.3±3.8%)<br><i>Ranunculus acris</i> (3.2±5.0%)<br><i><b>Holcus lanatus</b></i> (2.9±4.3%)<br><i><b>Poa trivialis</b></i> (2.8±5.7%)<br><i>Plantago lanceolata</i> (1.9±3.7%) | <i><b>Lolium perenne</b></i> (46.0±9.1%)<br><i>Taraxacum sp.</i> (14.1±6.0%)<br><i><b>Poa trivialis</b></i> (9.3±8.0%)<br><i><b>Alopecurus pratensis</b></i> (6.2±4.2%)<br><i>Ranunculus repens</i> (6.0±4.4%)<br><i>Bellis perennis</i> (4.9±5.2%)<br><u><i>Trifolium repens</i></u> (3.4±0.9%)<br><i>Ranunculus acris</i> (2.9±2.2%)<br><i><b>Phleum pratense</b></i> (1.9±3.8%)<br><i>Plantago lanceolata</i> (1.9±3.7%) |
|--|----------|-------------------------------------------------------------------------------------------------------------------------------------------------------------------------------------------------------------------------------------------------------------------------------------------------------------------------------------------------------------------------------------------------------------------|-----------------------------------------------------------------------------------------------------------------------------------------------------------------------------------------------------------------------------------------------------------------------------------------------------------------------------------------------------------------------------------------------------------------------------|

#### SUPPLEMENTARY EXCEL TABLES

All tables are present in the sheets of the excel file

Sheet 1: Table S2: Number of sycamore seedlings in experiment 1

Sheet 2: Table S3: Grass height in experiment 1

Sheet 3: Table S4: Concentration of hypoglycin A in sycamore seedlings in experiment 1

Sheet 4: Table S5: Number of sycamore seedlings in experiment 2

Sheet 5: Table S6: Grass height in experiment 2

Sheet 6: Table S7: Harvest yield in experiment 2

Sheet 7: Table S8: Nutritional values of the harvest from the experiment 2
